# Supplementary material
Source: PubMed Central journal article supplement (PMC9691522)
Supplement: NIHMS1831398-supplement-1.pdf [file NIHMS1831398-supplement-1.pdf]



**Supplemental Figure 1.** Proportion of all constipated patients (left panel) and constipated patients who also underwent defecography (right panel) who had anorectal manometry abnormalities (ie, reduced rectoanal gradient during evacuation and/or reduced anal squeeze increment and/or reduced rectal sensation). All 3 manometry variables were normal in 55% (left panel) or 49% of patients (right panel).

**Supplemental Figure 2.** Proportion of constipated patients with a prolonged balloon expulsion time stratified by the number of anorectal manometry abnormal findings. The balloon expulsion time was prolonged in all patients with 4 or more abnormal manometry findings.

**Supplemental Figure 3:** Receiver operating characteristic curve to predict a prolonged rectal balloon expulsion time from selected anorectal manometry variables (ie, rectoanal gradient, anal squeeze increment, and rectal volume threshold for urgency) in all participants with complete HR\_ARM data.

**All Constipated Patients  
with Sensation Data  
n=459**

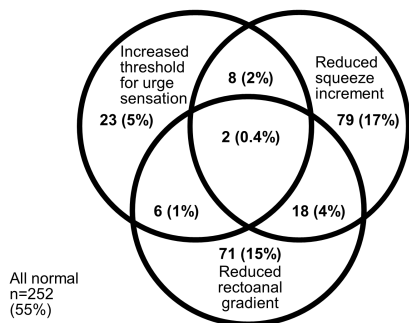

**A**

**All Constipated Patients  
with Defecography  
n=158**

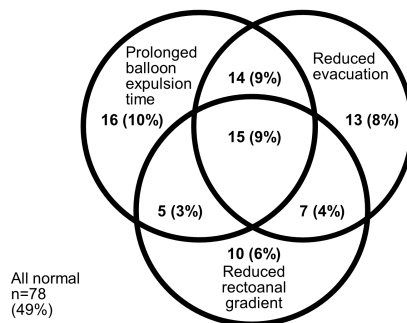

**B**

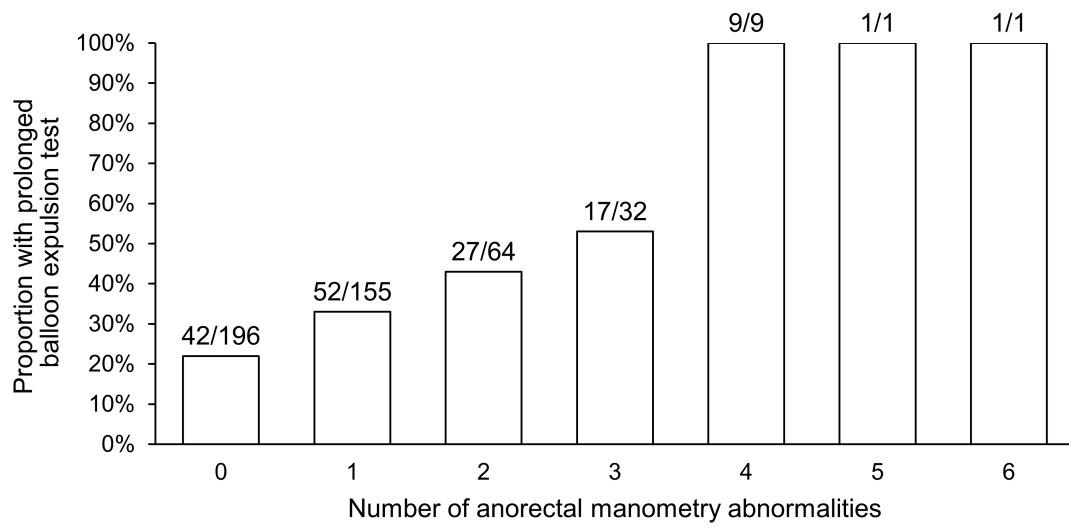

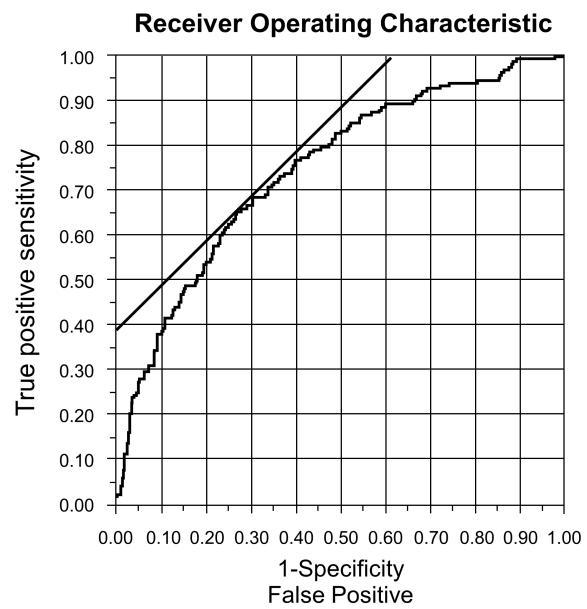

**Supplemental Table 1: Normal values for anorectal pressures in healthy controls with a normal balloon expulsion test**

|                                                 | <b>male<br/>(n=47)</b> | <b>female under<br/>50 (n=78)</b> | <b>female 50 and<br/>over (n=39)</b> | <b>combined<br/>females<br/>(n=117)</b> |
|-------------------------------------------------|------------------------|-----------------------------------|--------------------------------------|-----------------------------------------|
|                                                 | <b>10-90%</b>          | <b>10-90%</b>                     | <b>10-90%</b>                        | <b>10-90%</b>                           |
| <i>Mean resting anal pressure, mmHg</i>         | 59 to 119.4            | 63.5 to 120.6                     | 43.2 to 107.1                        | 53.2 to 117.9                           |
| <i>Anal squeeze pressure increment, mmHg</i>    | 73 to 315              | 37.3 to 181                       | 35.4 to 189.4                        | 35.7 to 182.8                           |
| <i>Evacuation</i>                               |                        |                                   |                                      |                                         |
| <i>Rectal pressure increment, mmHg</i>          | 15.7 to 84             | -4.1 to 48.7                      | 2.3 to 58                            | -1.5 to 52.3                            |
| <i>Residual anal pressure, mmHg</i>             | 57.3 to 167            | 43.2 to 107.4                     | 36.7 to 104.4                        | 40.9 to 104.4                           |
| <i>Anal relaxation (%)</i>                      | -70 to 32%             | -2 to 51%                         | -95 to 43%                           | -24 to 47%                              |
| <i>Rectoanal gradient, mmHg</i>                 | -119.3 to -8           | -73.8 to -5.7                     | -66.7 to 3.7                         | -67.3 to -2.5                           |
| <i>Volume threshold for urge sensation (ml)</i> | 60 to 120              | 50 to 120                         | 60 to 120                            | 50 to 120                               |

These values differ slightly from our most recent paper because they include additional asymptomatic participants who were studied after that paper was published.<sup>9</sup>
